# Supplementary material
Source: PubMed Central journal article supplement (PMC6800651)

**A**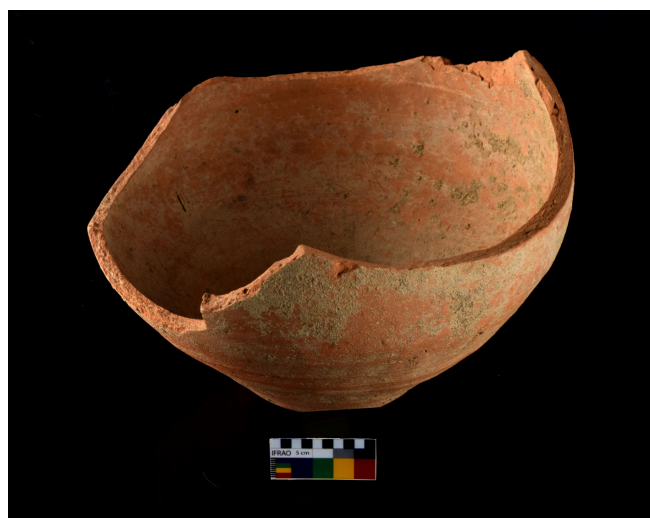**E**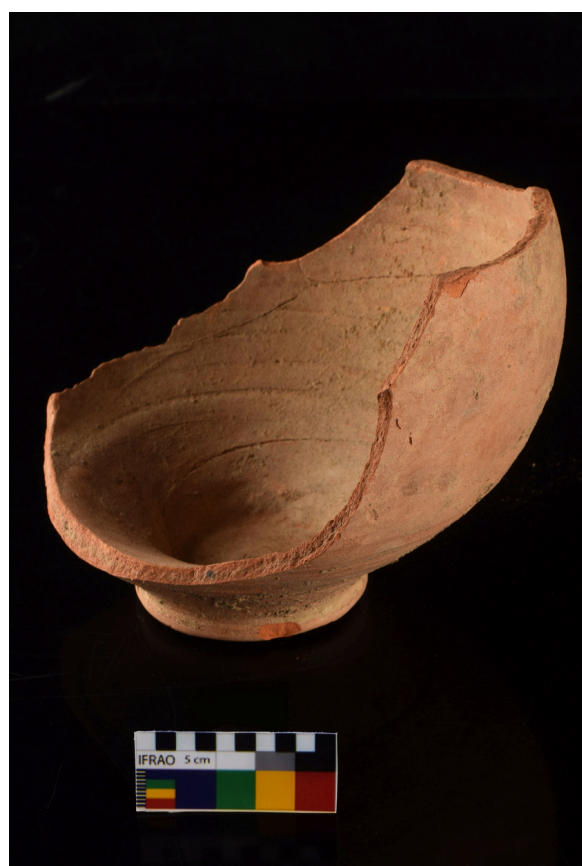**I**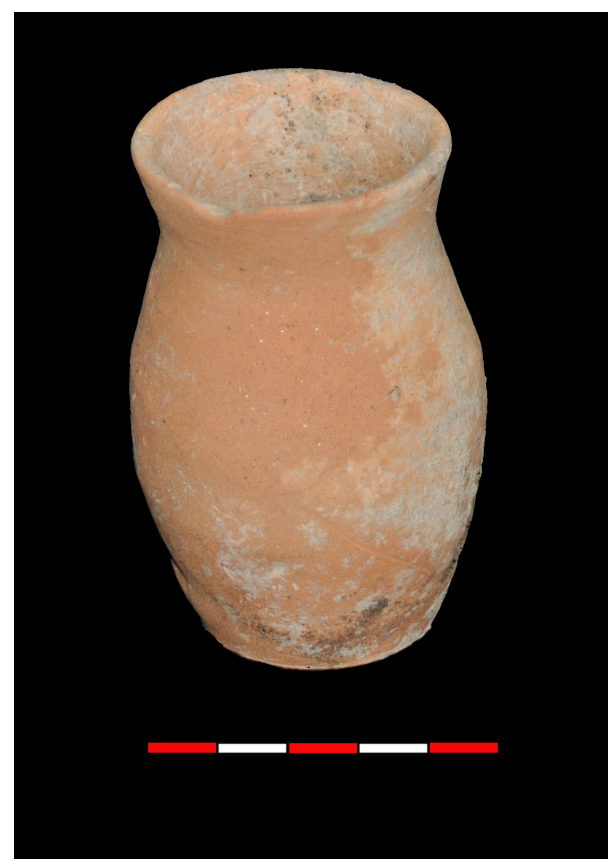**B**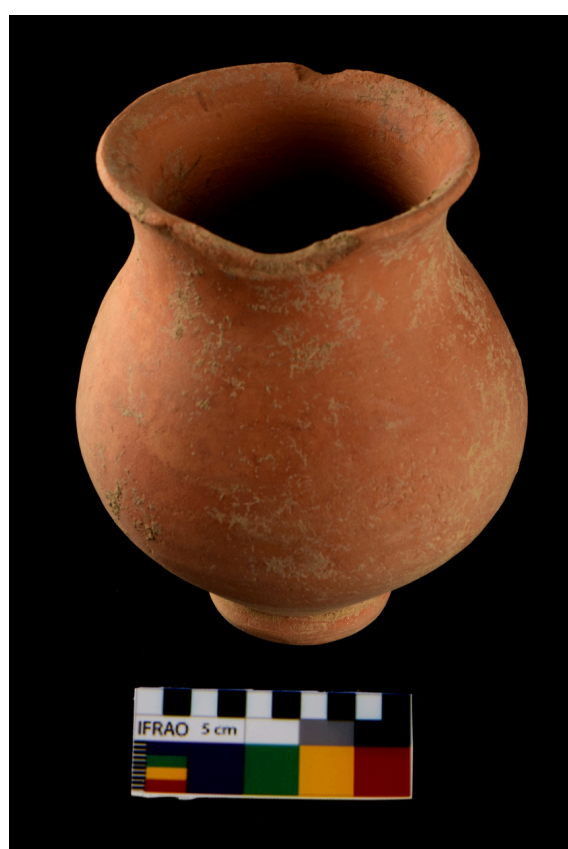**F**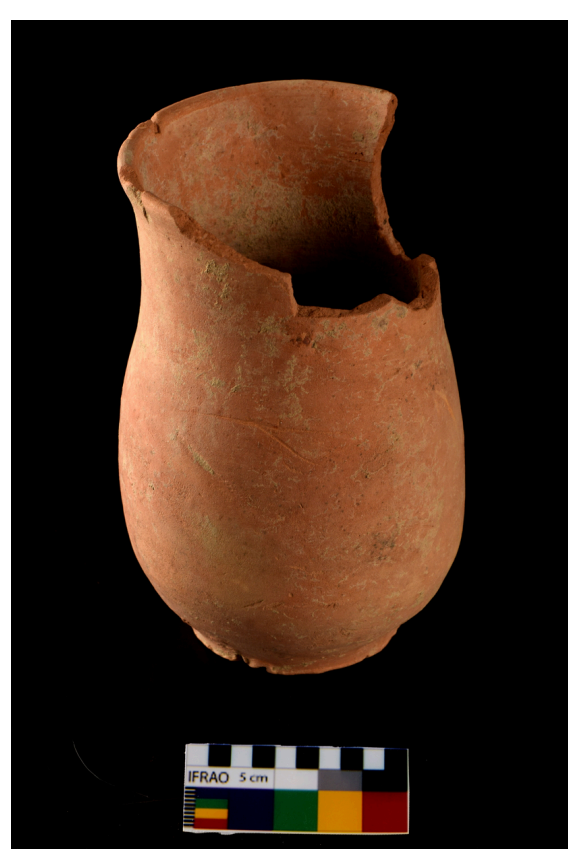**J**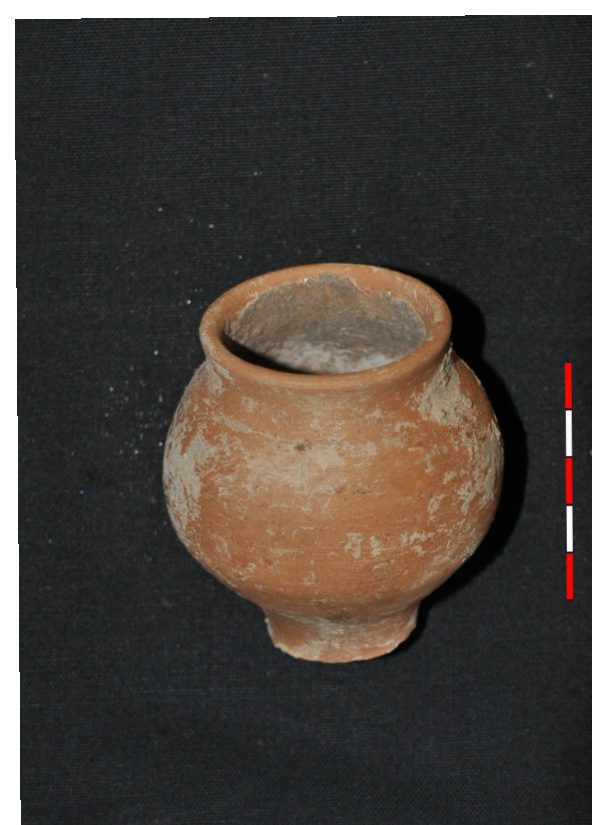**C**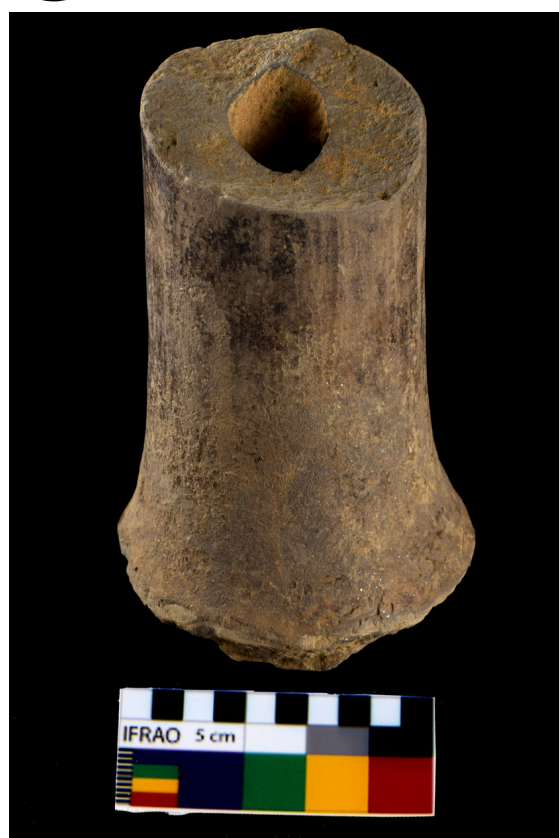**G**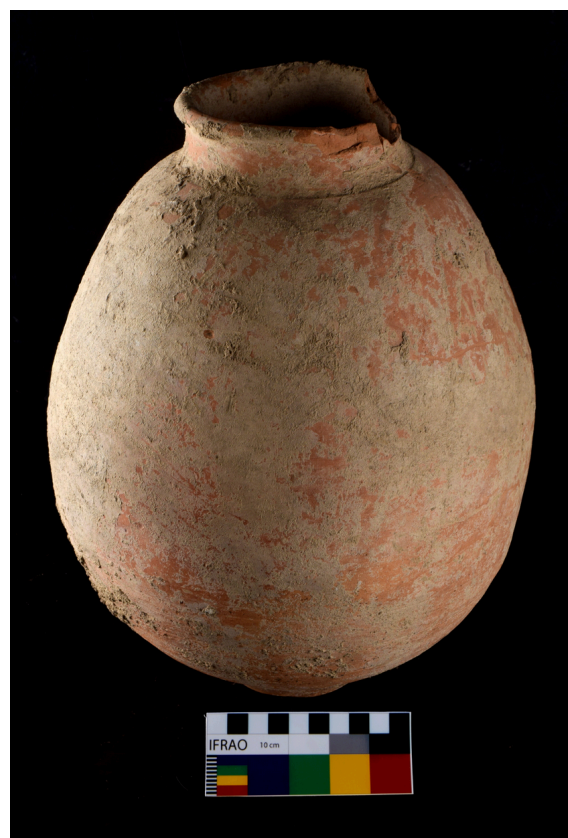**K**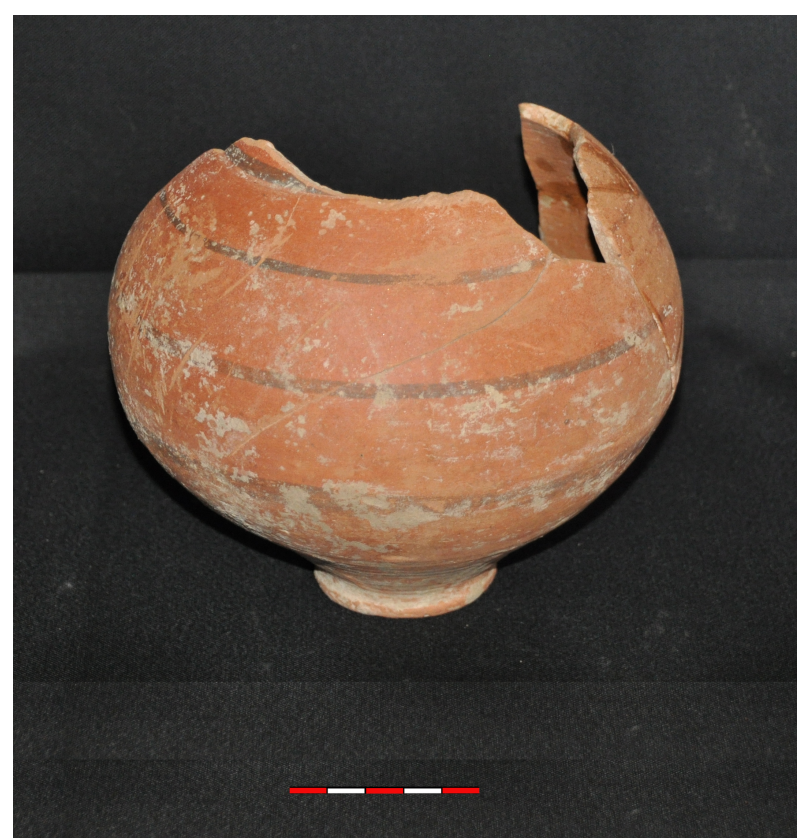**D**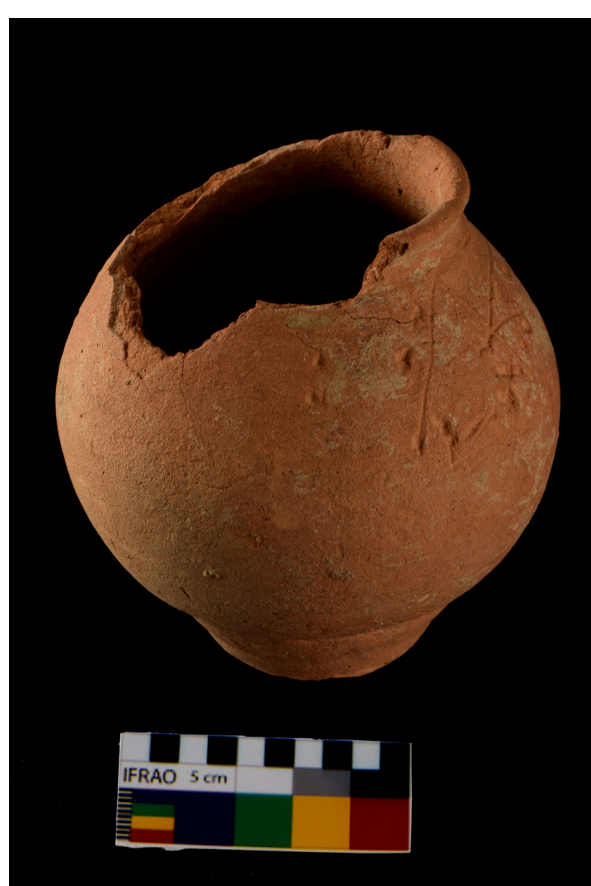**H**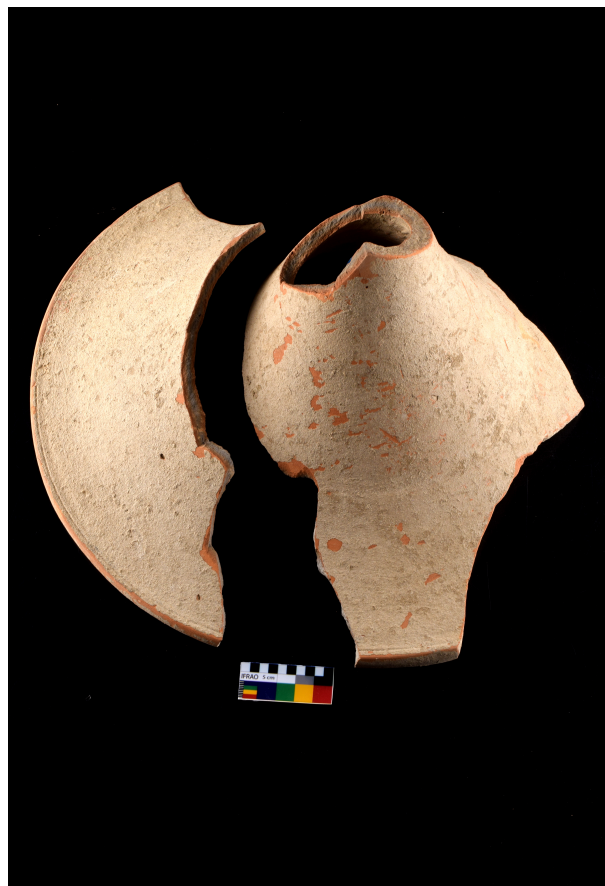**L**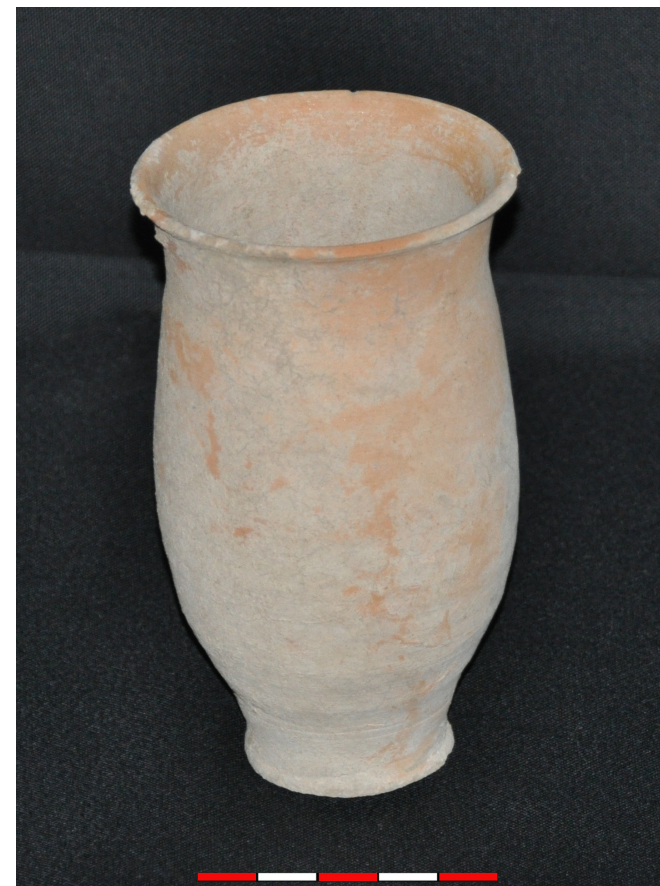

Supplement: NIHMS1538584-supplement-1.pdf [file NIHMS1538584-supplement-1.pdf]

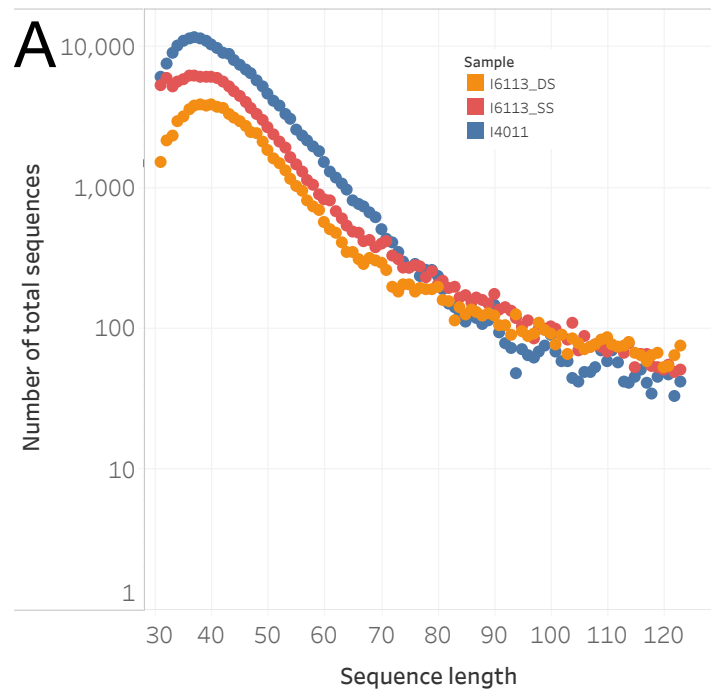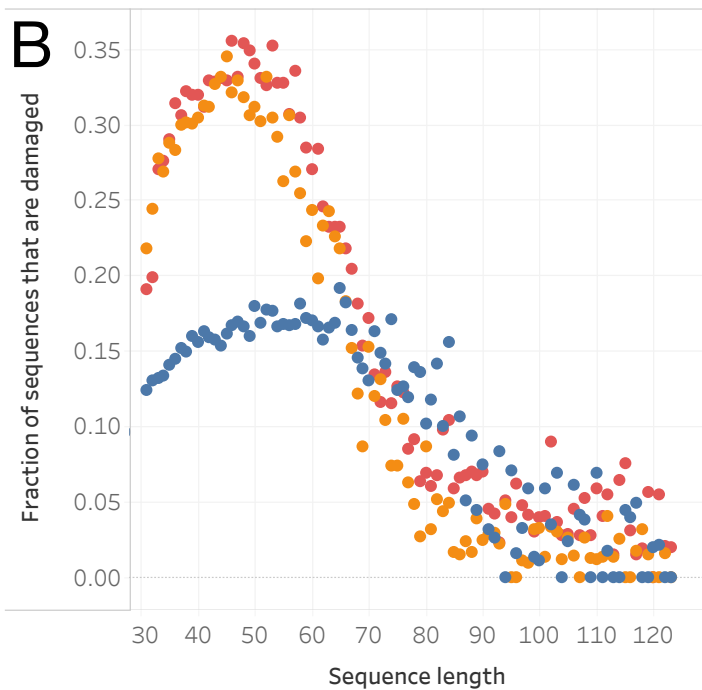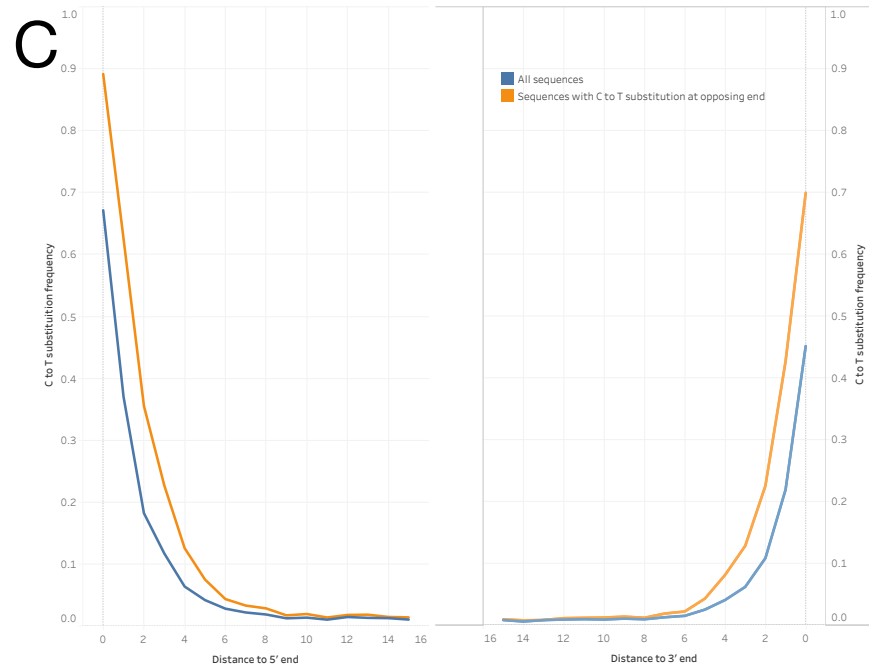

Supplement: NIHMS1538584-supplement-2.pdf [file NIHMS1538584-supplement-2.pdf]

A

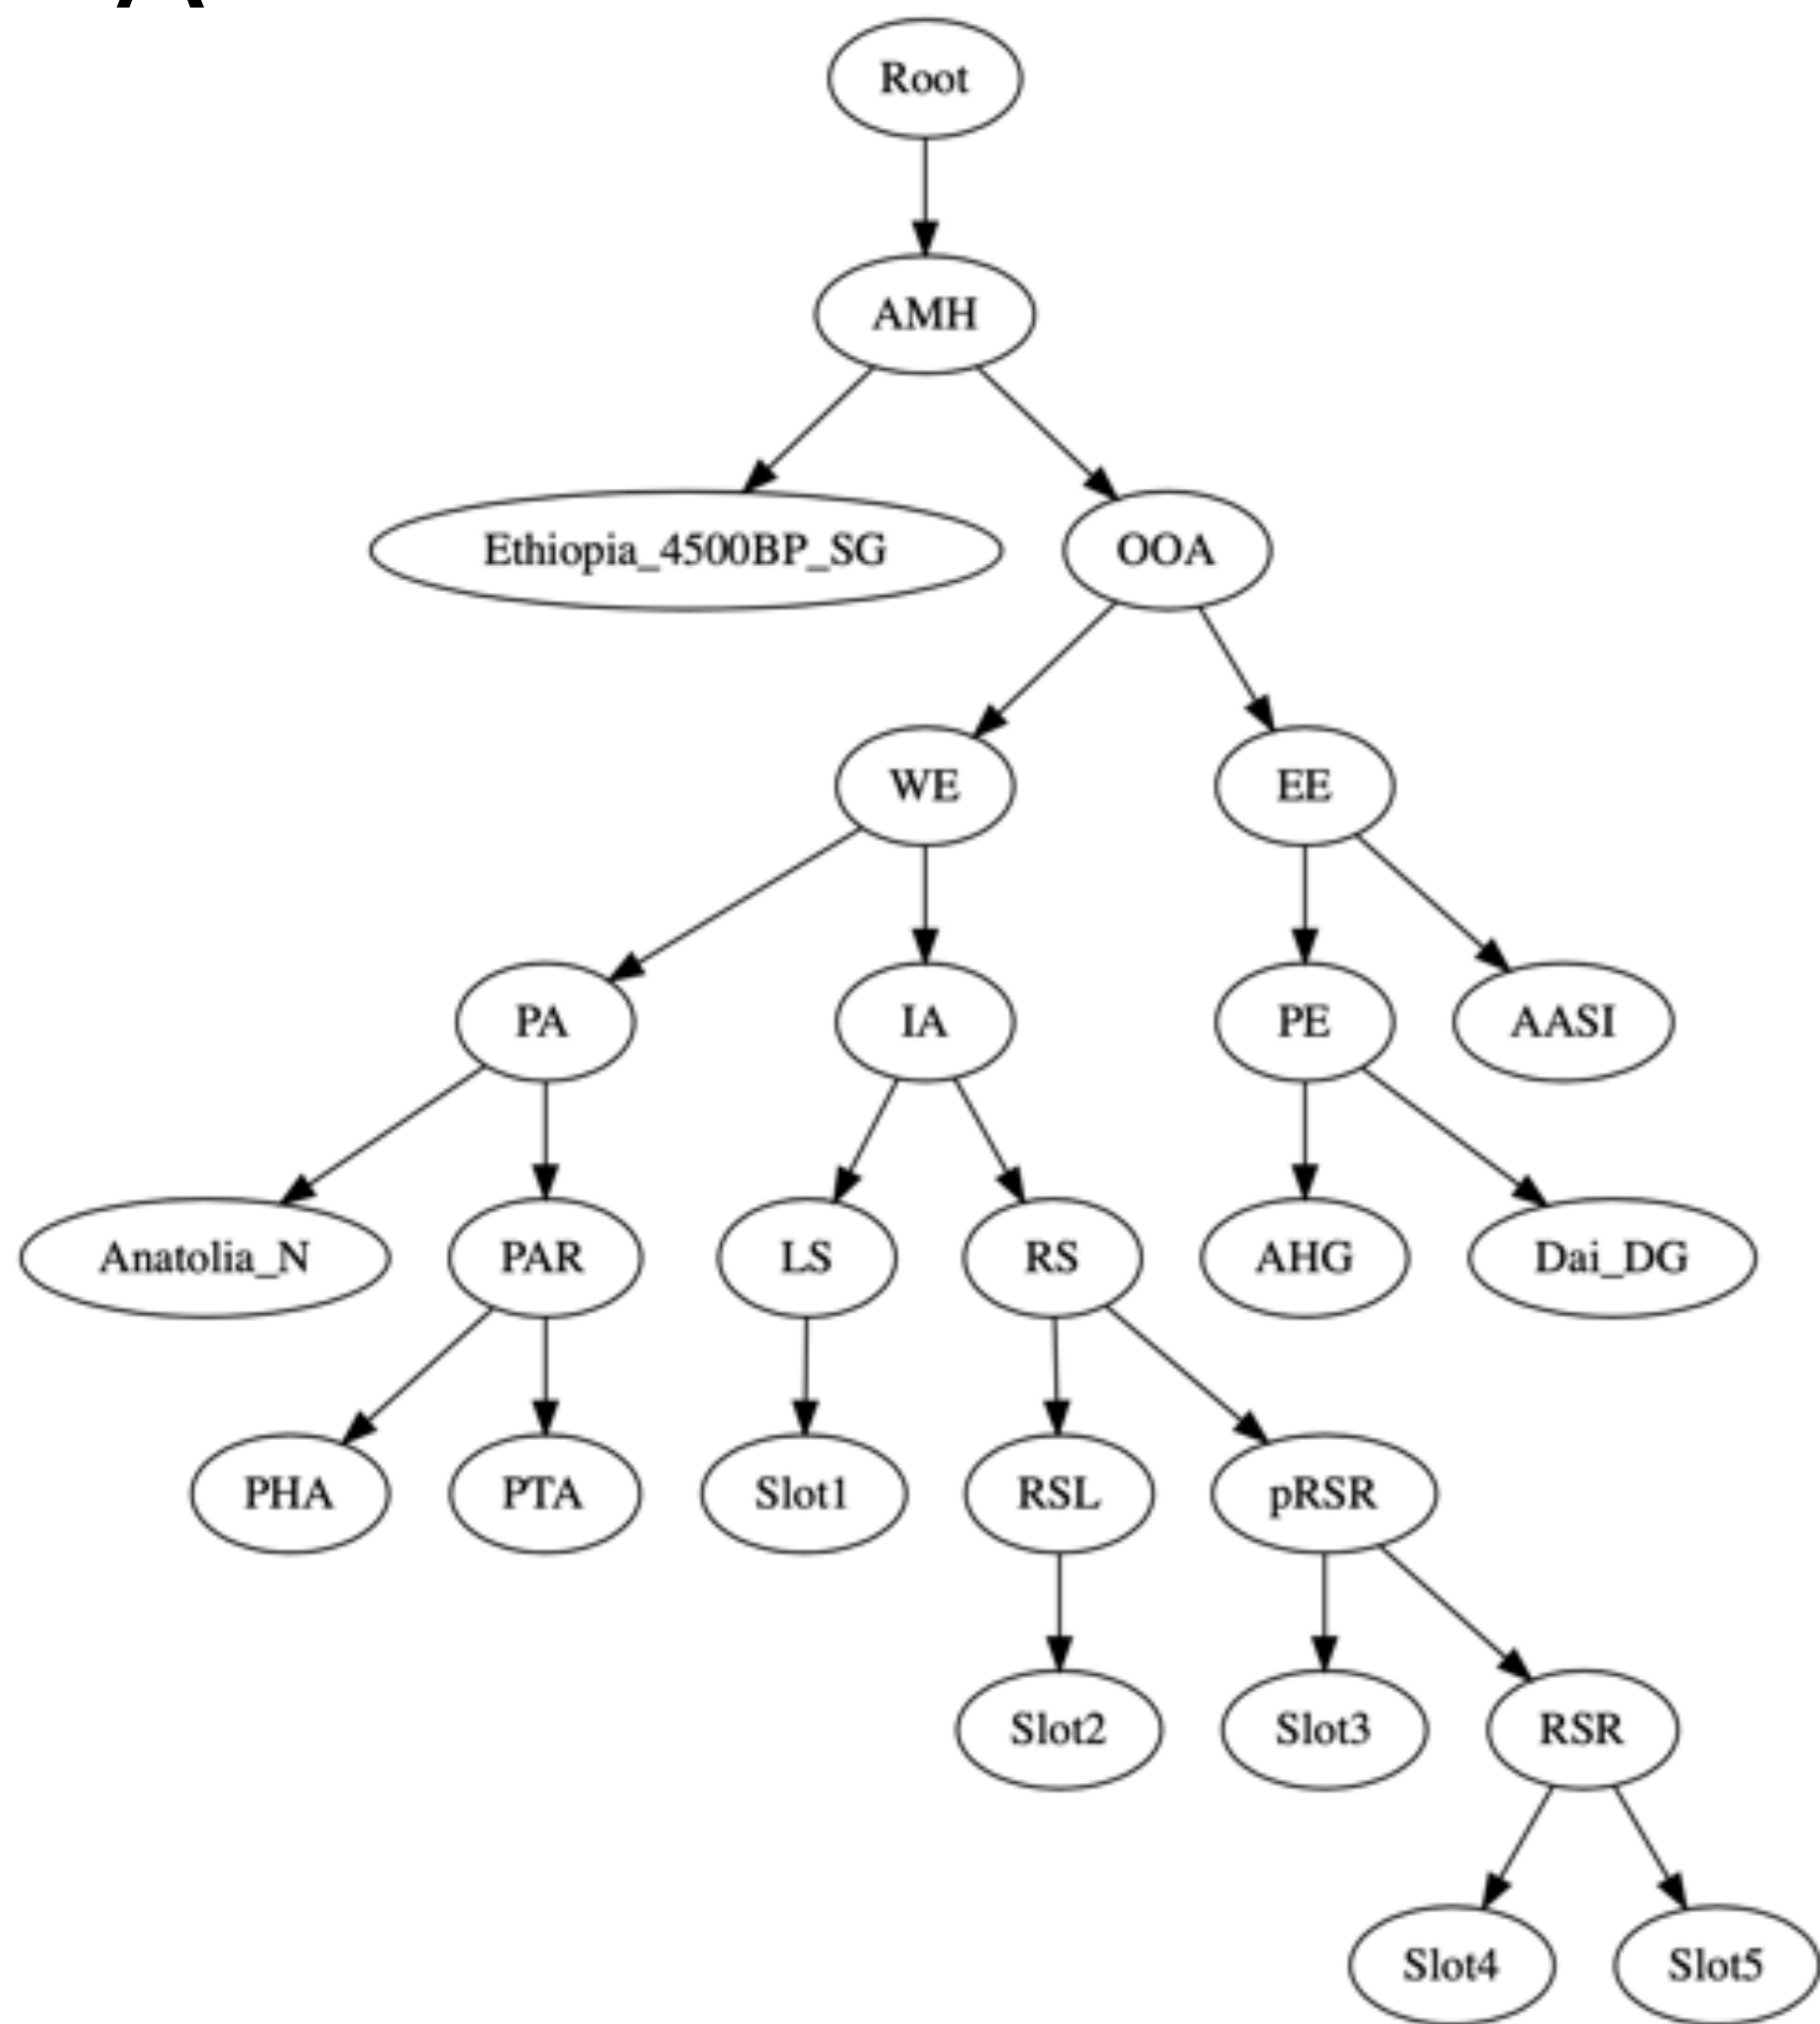

B

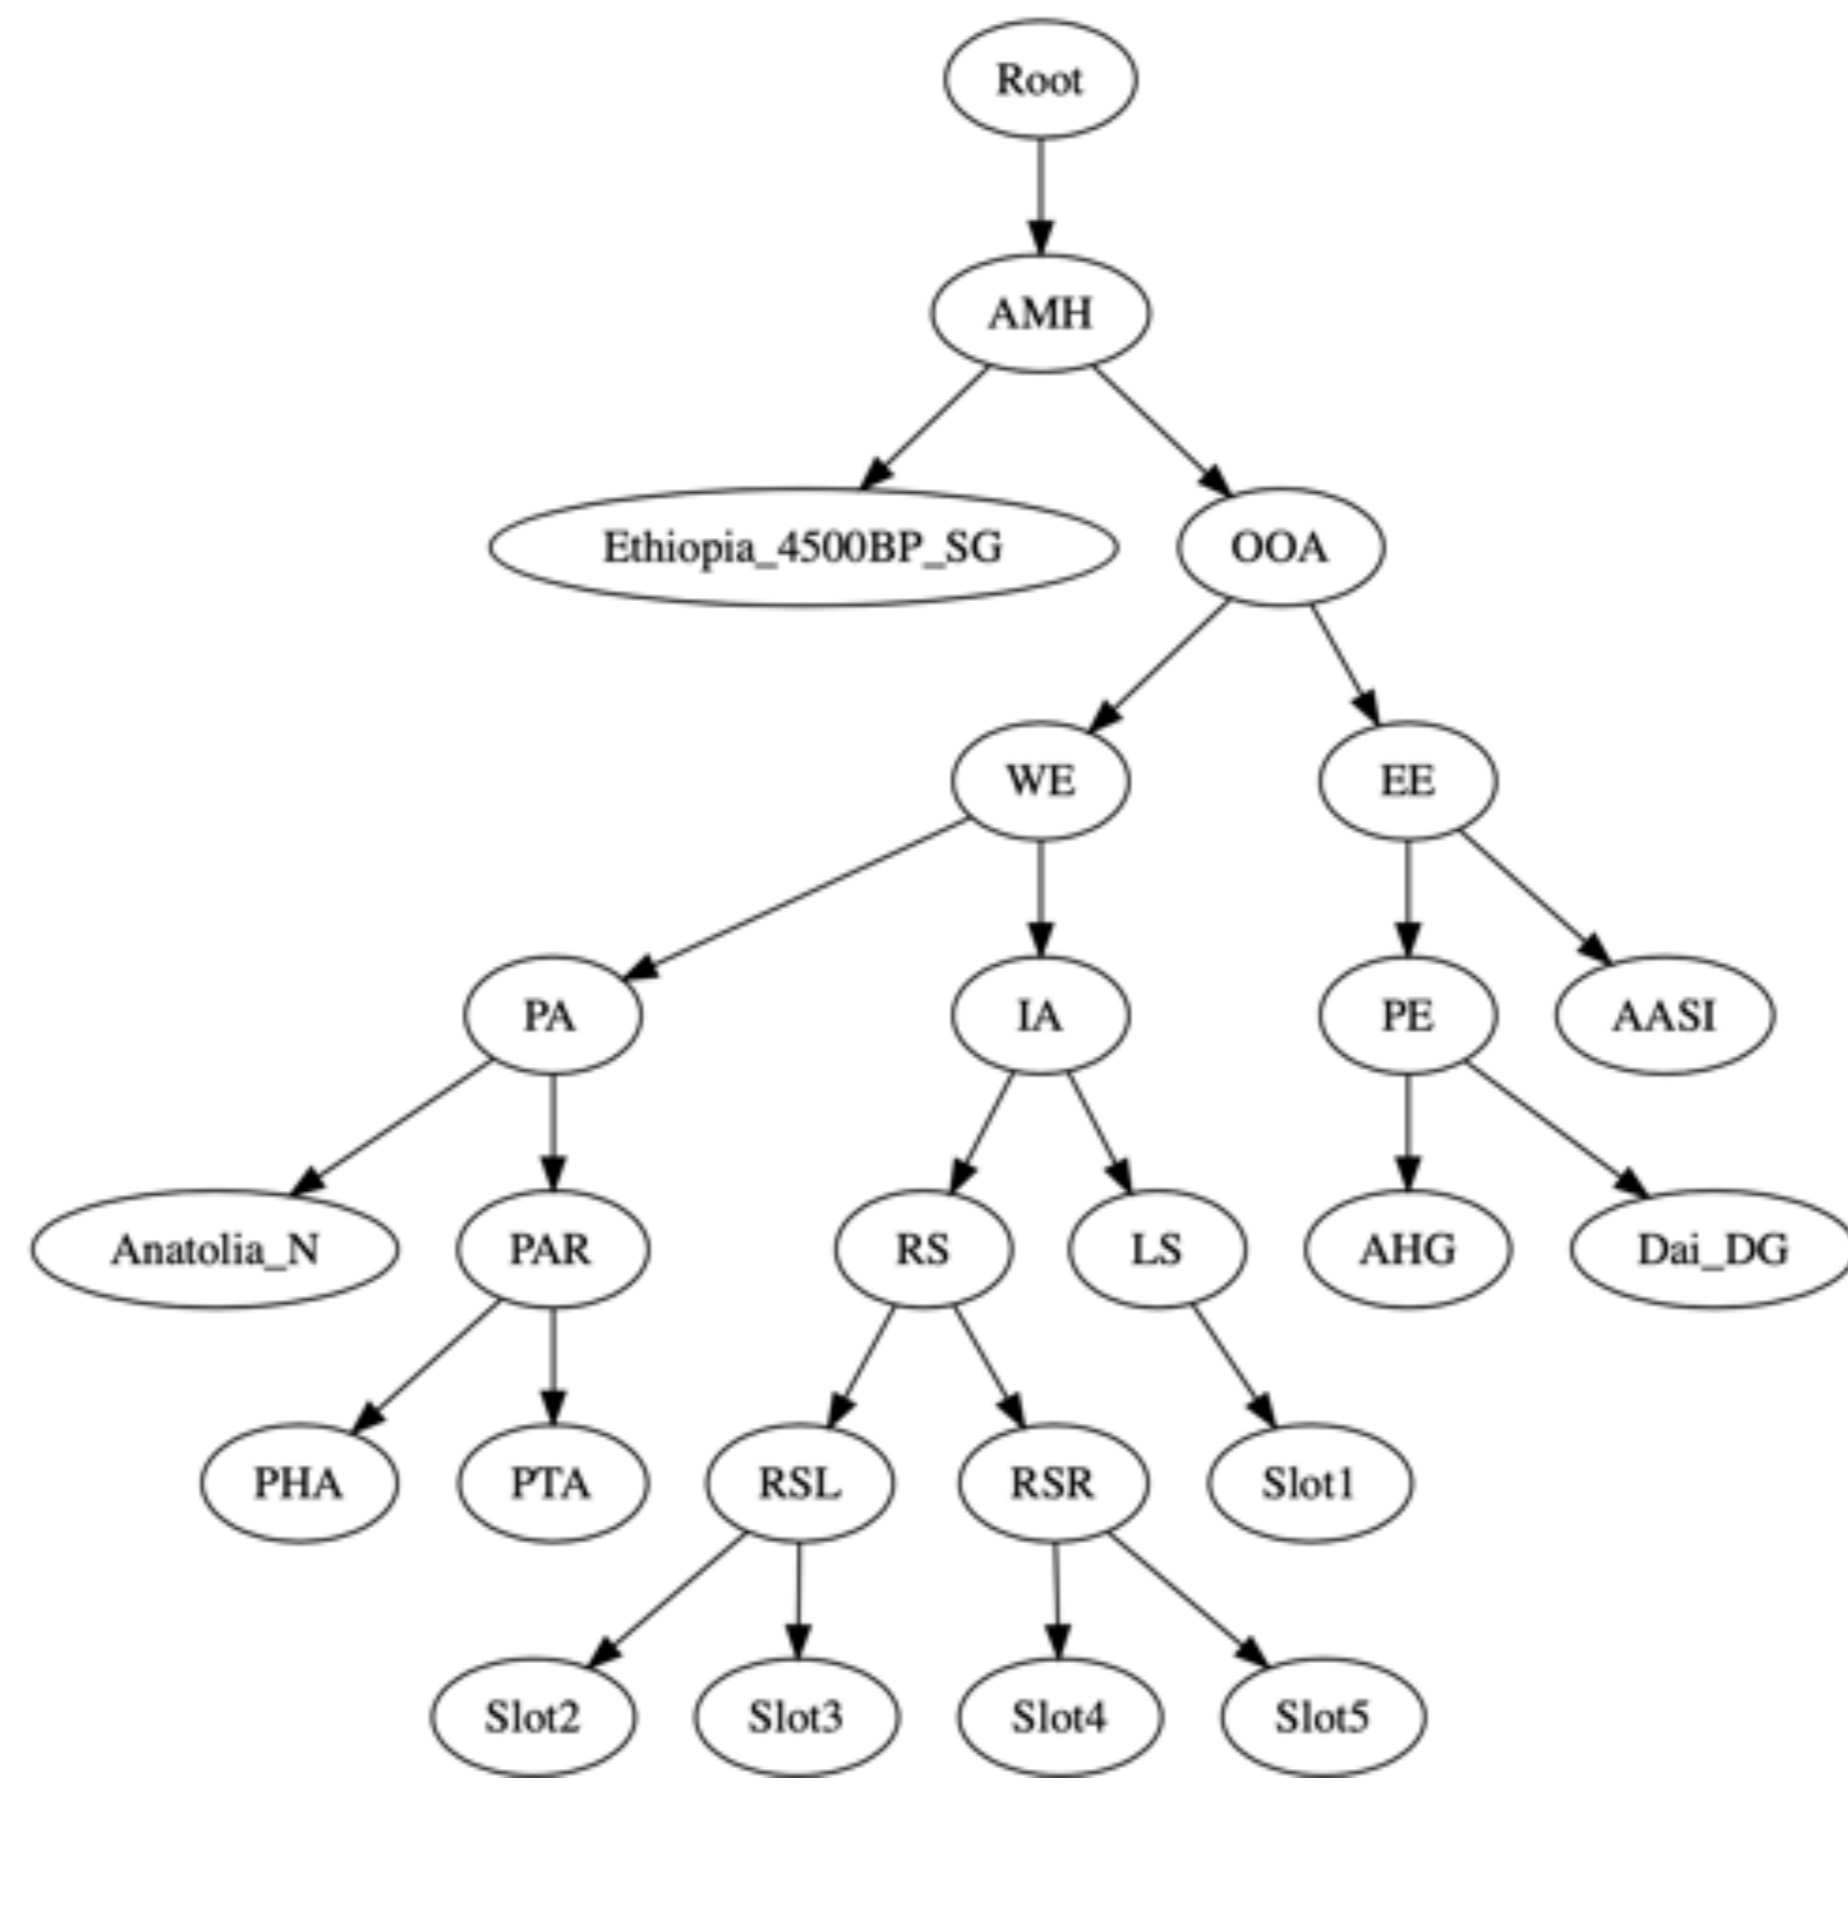

C

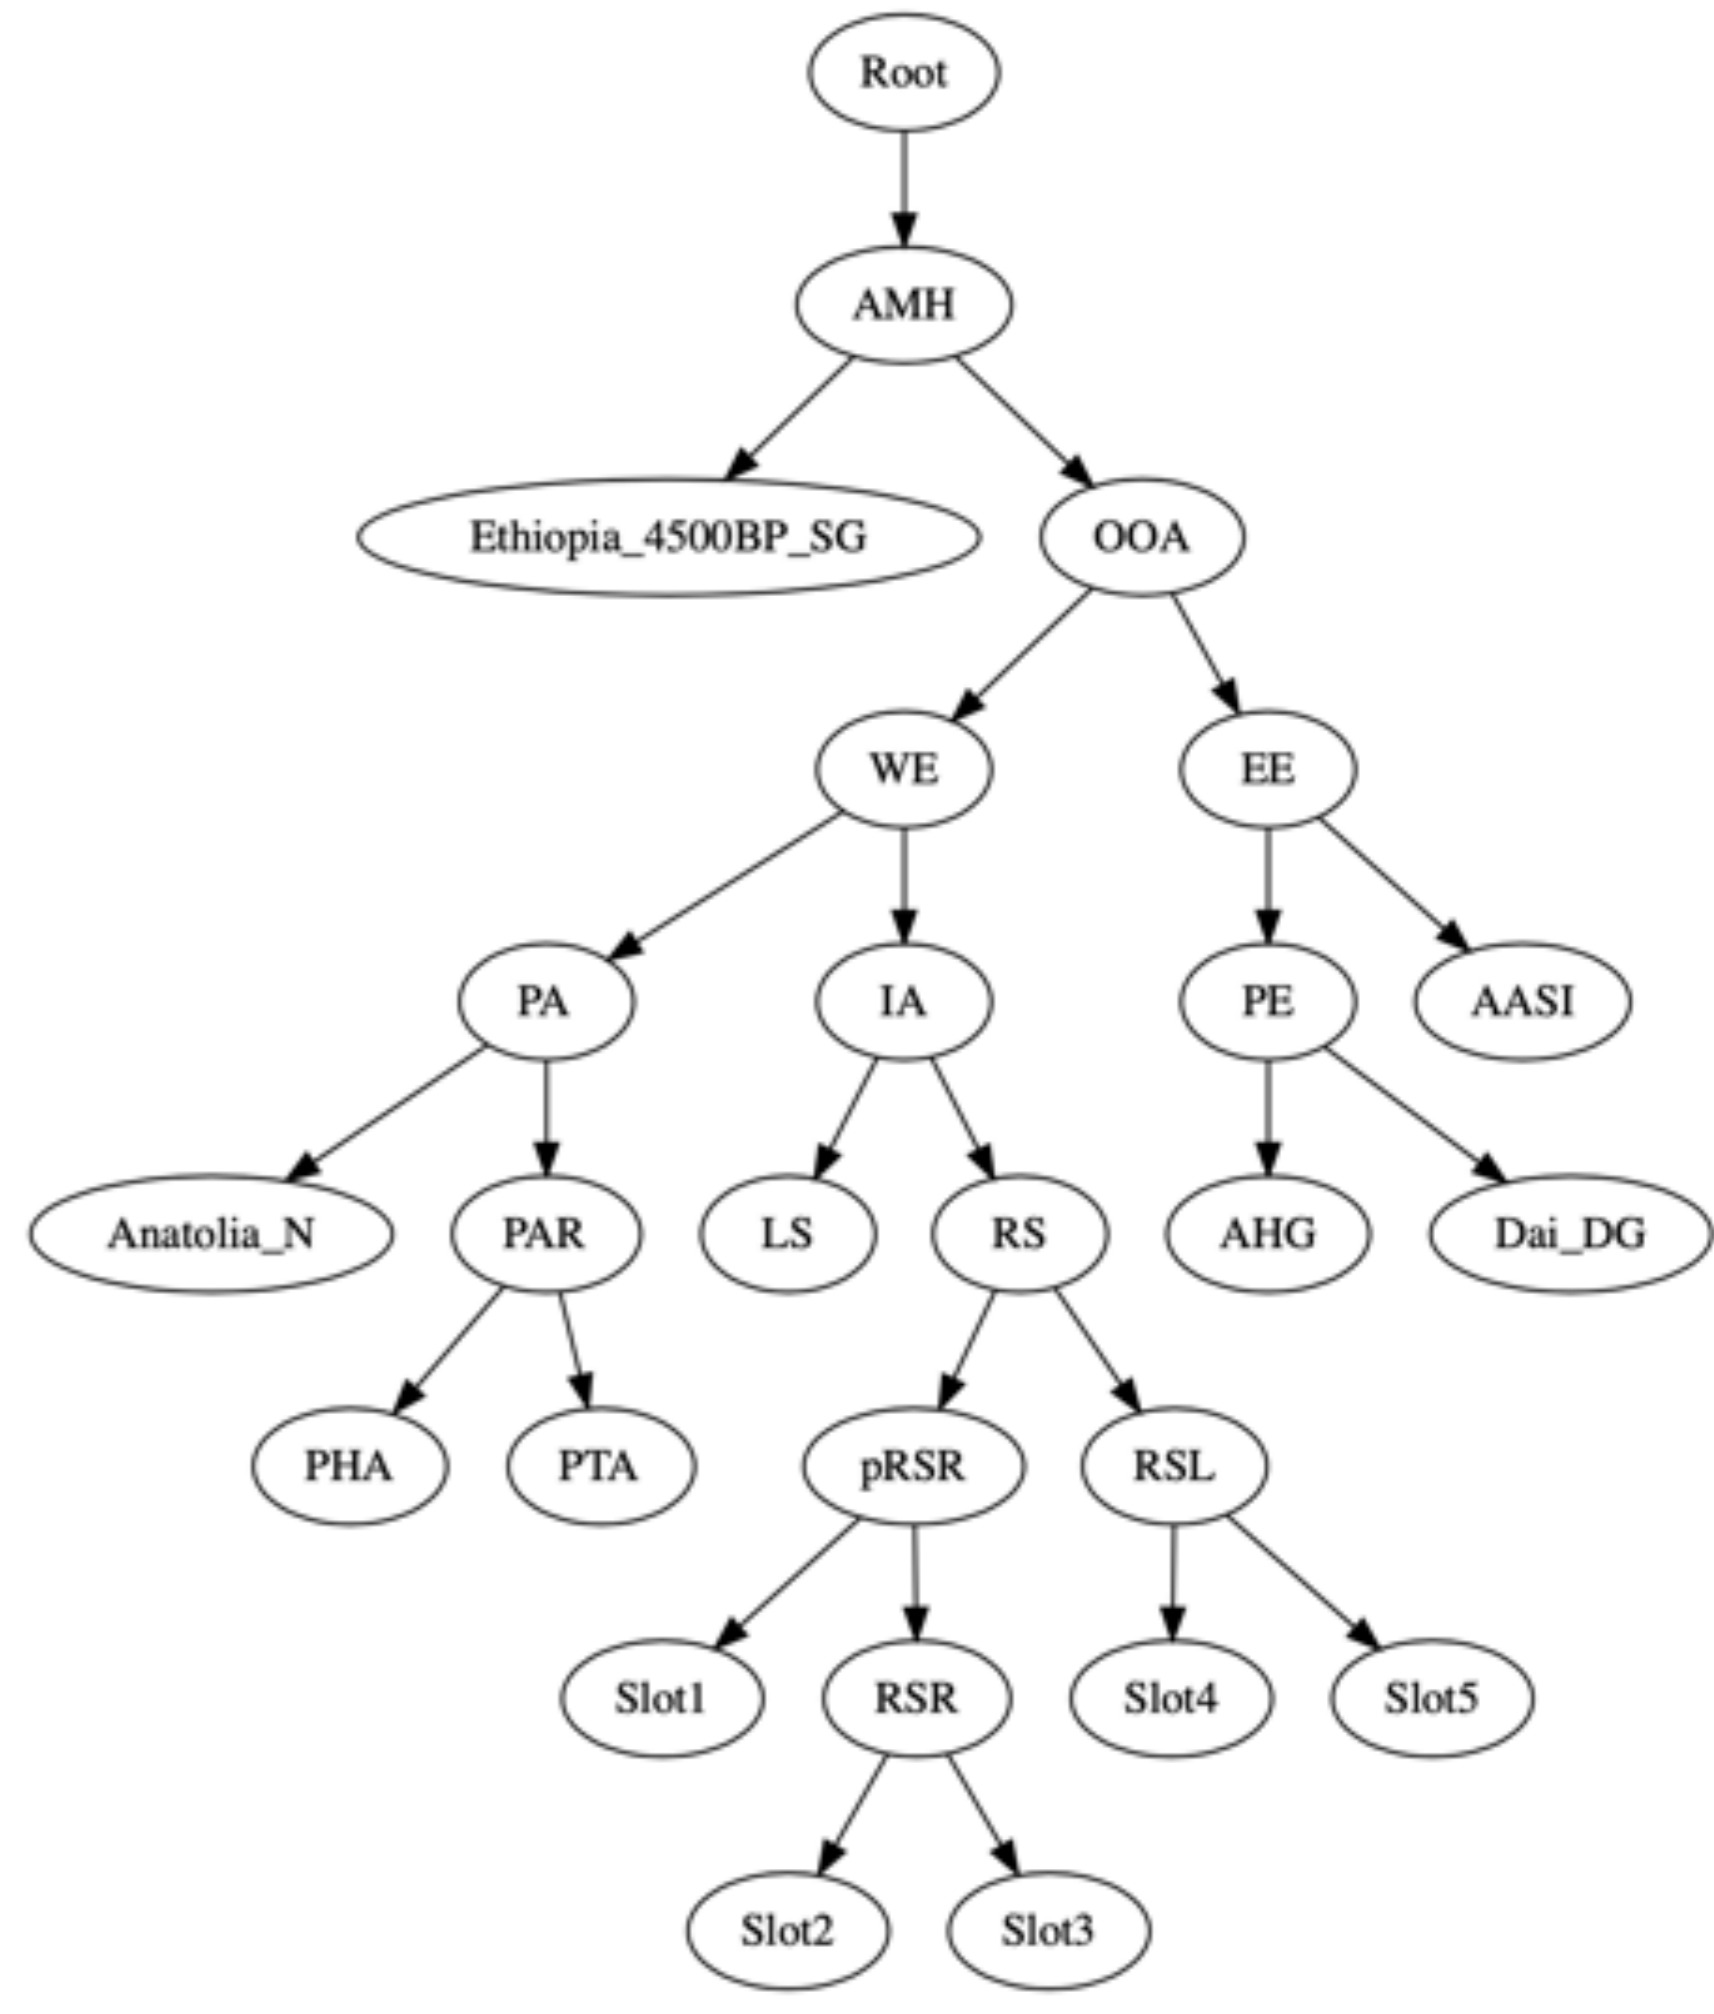

Supplement: NIHMS1538584-supplement-3.pdf [file NIHMS1538584-supplement-3.pdf]

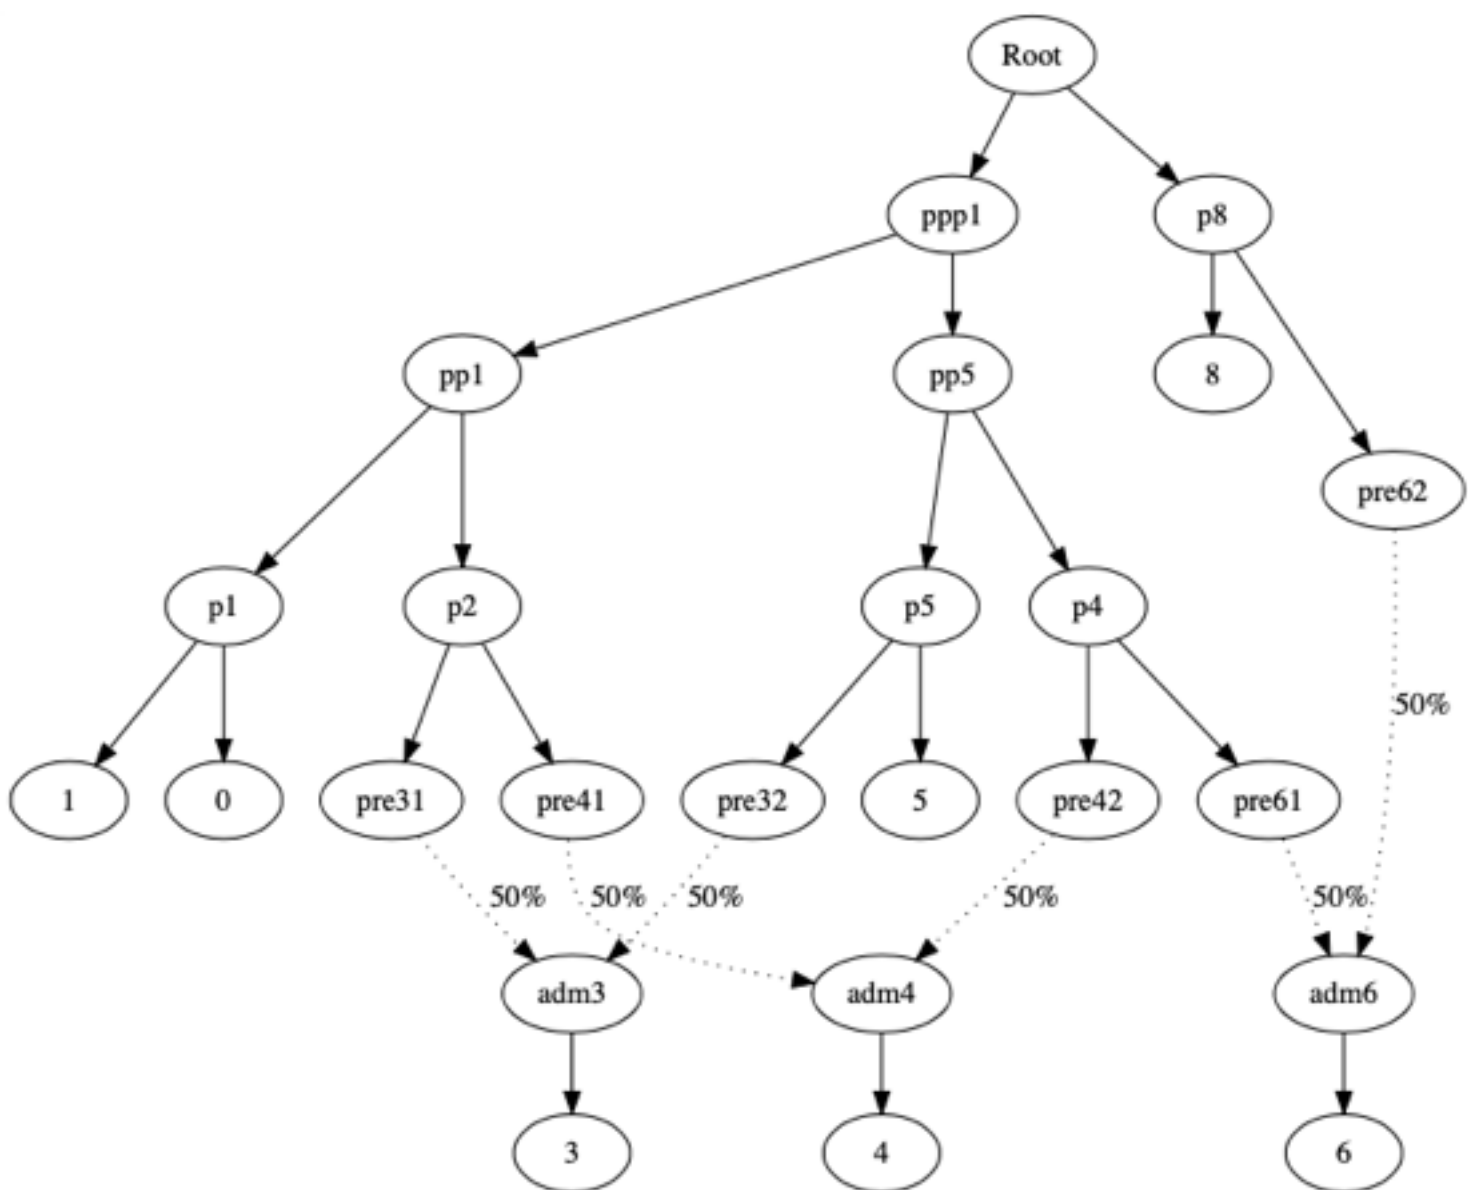

Supplement: NIHMS1538584-supplement-4.pdf [file NIHMS1538584-supplement-4.pdf]
